# Supplementary material for: Patient Derived Colonoids as Drug Testing Platforms–Critical Importance of Oxygen Concentration
Source: PubMed Central journal article supplement (PMC8156408; doi:10.3389/fphar.2021.679741), 2021-05-13
Supplement: Image1.pdf [file Image1.pdf]

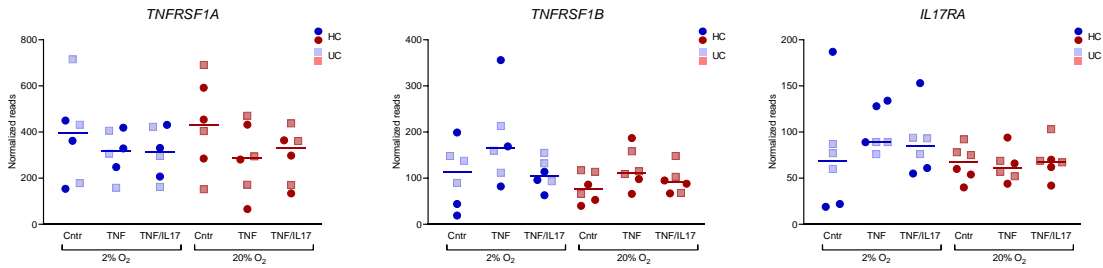

**Supplementary Figure SF1: Receptors for TNF and IL-17.** Expression of *TNFRSF1A/1B* and *IL17RA* in colonoids derived from healthy controls (circles) and patients with UC (squares) in 20% (red) or 2% (blue) O<sub>2</sub> and treatment with TNF, TNF/IL17 or untreated control. Individual values (normalized reads) with median are shown.
